# Supplementary material for: Systematic Moiety Variations of Ultrashort Peptides Produce Profound Effects on Self-Assembly, Nanostructure Formation, Hydrogelation, and Phase Transition
Source: PubMed Central journal article supplement (PMC5635115; doi:10.1038/s41598-017-12694-9), 2017-10-10

# checkCIF/PLATON report

Structure factors have been supplied for datablock(s) redo2

THIS REPORT IS FOR GUIDANCE ONLY. IF USED AS PART OF A REVIEW PROCEDURE FOR PUBLICATION, IT SHOULD NOT REPLACE THE EXPERTISE OF AN EXPERIENCED CRYSTALLOGRAPHIC REFEREE.

No syntax errors found.      CIF dictionary      Interpreting this report

## Datablock: redo2

---

|                 |                |                    |               |
|-----------------|----------------|--------------------|---------------|
| Bond precision: | C-C = 0.0112 A | Wavelength=1.54178 |               |
| Cell:           | a=31.362(3)    | b=5.4514(5)        | c=13.3403(13) |
|                 | alpha=90       | beta=102.504(5)    | gamma=90      |
| Temperature:    | 100 K          |                    |               |
|                 | Calculated     | Reported           |               |
| Volume          | 2226.7(4)      | 2226.7(4)          |               |
| Space group     | C 2            | C 2                |               |
| Hall group      | C 2y           | C 2y               |               |
| Moiety formula  | C19 H33 N3 O7  | ?                  |               |
| Sum formula     | C19 H33 N3 O7  | C19 H33 N3 O7      |               |
| Mr              | 415.48         | 415.48             |               |
| Dx,g cm-3       | 1.239          | 1.239              |               |
| Z               | 4              | 4                  |               |
| Mu (mm-1)       | 0.786          | 0.786              |               |
| F000            | 896.0          | 896.0              |               |
| F000'           | 898.98         |                    |               |
| h,k,lmax        | 32,5,14        | 32,5,14            |               |
| Nref            | 2711[ 1533]    | 2662               |               |
| Tmin,Tmax       | 0.927,0.969    |                    |               |
| Tmin'           | 0.924          |                    |               |

Correction method= Not given

Data completeness= 1.74/0.98      Theta(max)= 54.225

R(reflections)= 0.0588( 1785)      wR2(reflections)= 0.1662( 2662)

S = 0.942      Npar= 273

---

The following ALERTS were generated. Each ALERT has the format  
**test-name\_ALERT\_alert-type\_alert-level.**  
Click on the hyperlinks for more details of the test.

---

**Alert level A**

THETM01\_ALERT\_3\_A The value of  $\sin(\theta_{\max})/\text{wavelength}$  is less than 0.550  
Calculated  $\sin(\theta_{\max})/\text{wavelength} = 0.5262$

---

**Alert level B**

PLAT340\_ALERT\_3\_B Low Bond Precision on C-C Bonds ..... 0.0112 Ang.

---

**Alert level C**

PLAT089\_ALERT\_3\_C Poor Data / Parameter Ratio ( $Z_{\max} < 18$ ) ..... 5.59 Note  
PLAT222\_ALERT\_3\_C Non-Solvent Resd 1 H Uiso(max)/Uiso(min) Range 4.3 Ratio  
PLAT911\_ALERT\_3\_C Missing # FCF Refl Between THmin & STh/L= 0.526 6 Report  
PLAT978\_ALERT\_2\_C Number C-C Bonds with Positive Residual Density. 0 Note

---

**Alert level G**

PLAT002\_ALERT\_2\_G Number of Distance or Angle Restraints on AtSite 29 Note  
PLAT007\_ALERT\_5\_G Number of Unrefined Donor-H Atoms ..... 5 Report  
PLAT032\_ALERT\_4\_G Std. Uncertainty on Flack Parameter Value High . 0.400 Report  
PLAT093\_ALERT\_1\_G No s.u.'s on H-positions, Refinement Reported as mixed Check  
PLAT128\_ALERT\_4\_G Alternate Setting for Input Space Group C2 12 Note  
PLAT172\_ALERT\_4\_G The CIF-Embedded .res File Contains DFIX Records 27 Report  
PLAT173\_ALERT\_4\_G The CIF-Embedded .res File Contains DANG Records 32 Report  
PLAT174\_ALERT\_4\_G The CIF-Embedded .res File Contains FLAT Records 4 Report  
PLAT432\_ALERT\_2\_G Short Inter X...Y Contact OxT\_13 .. Ch3\_10 .. 3.00 Ang.  
PLAT720\_ALERT\_4\_G Number of Unusual/Non-Standard Labels ..... 62 Note  
PLAT791\_ALERT\_4\_G The Model has Chirality at Ca\_11 (Chiral SPGR) S Verify  
PLAT791\_ALERT\_4\_G The Model has Chirality at Ca\_12 (Chiral SPGR) S Verify  
PLAT791\_ALERT\_4\_G The Model has Chirality at Ca\_13 (Chiral SPGR) S Verify  
PLAT860\_ALERT\_3\_G Number of Least-Squares Restraints ..... 86 Note  
PLAT916\_ALERT\_2\_G Hooft y and Flack x Parameter values differ by . 0.18 Check

---

- 1 **ALERT level A** = Most likely a serious problem - resolve or explain
- 1 **ALERT level B** = A potentially serious problem, consider carefully
- 4 **ALERT level C** = Check. Ensure it is not caused by an omission or oversight
- 15 **ALERT level G** = General information/check it is not something unexpected

- 1 ALERT type 1 CIF construction/syntax error, inconsistent or missing data
  - 4 ALERT type 2 Indicator that the structure model may be wrong or deficient
  - 6 ALERT type 3 Indicator that the structure quality may be low
  - 9 ALERT type 4 Improvement, methodology, query or suggestion
  - 1 ALERT type 5 Informative message, check
-

It is advisable to attempt to resolve as many as possible of the alerts in all categories. Often the minor alerts point to easily fixed oversights, errors and omissions in your CIF or refinement strategy, so attention to these fine details can be worthwhile. In order to resolve some of the more serious problems it may be necessary to carry out additional measurements or structure refinements. However, the purpose of your study may justify the reported deviations and the more serious of these should normally be commented upon in the discussion or experimental section of a paper or in the "special\_details" fields of the CIF. checkCIF was carefully designed to identify outliers and unusual parameters, but every test has its limitations and alerts that are not important in a particular case may appear. Conversely, the absence of alerts does not guarantee there are no aspects of the results needing attention. It is up to the individual to critically assess their own results and, if necessary, seek expert advice.

### Publication of your CIF in IUCr journals

A basic structural check has been run on your CIF. These basic checks will be run on all CIFs submitted for publication in IUCr journals (*Acta Crystallographica*, *Journal of Applied Crystallography*, *Journal of Synchrotron Radiation*); however, if you intend to submit to *Acta Crystallographica Section C* or *E* or *IUCrData*, you should make sure that full publication checks are run on the final version of your CIF prior to submission.

### Publication of your CIF in other journals

Please refer to the *Notes for Authors* of the relevant journal for any special instructions relating to CIF submission.

### Validation response form

Please find below a validation response form (VRF) that can be filled in and pasted into your CIF.

```
# start Validation Reply Form
_vrf_THETM01_redo2
;
PROBLEM: The value of sine(theta_max)/wavelength is less than 0.550
RESPONSE: ...
;
_vrf_PLAT089_redo2
;
PROBLEM: Poor Data / Parameter Ratio (Zmax < 18) ..... 5.59 Note
RESPONSE: ...
;
_vrf_PLAT222_redo2
;
PROBLEM: Non-Solvent Resd 1   H Uiso(max)/Uiso(min) Range 4.3 Ratio
RESPONSE: ...
;
_vrf_PLAT911_redo2
;
PROBLEM: Missing # FCF Refl Between THmin & STh/L= 0.526 6 Report
RESPONSE: ...
;
_vrf_PLAT978_redo2
;
PROBLEM: Number C-C Bonds with Positive Residual Density. 0 Note
RESPONSE: ...
;
# end Validation Reply Form
```

PLATON version of 27/03/2017; check.def file version of 24/03/2017

Datablock redo2 - ellipsoid plot

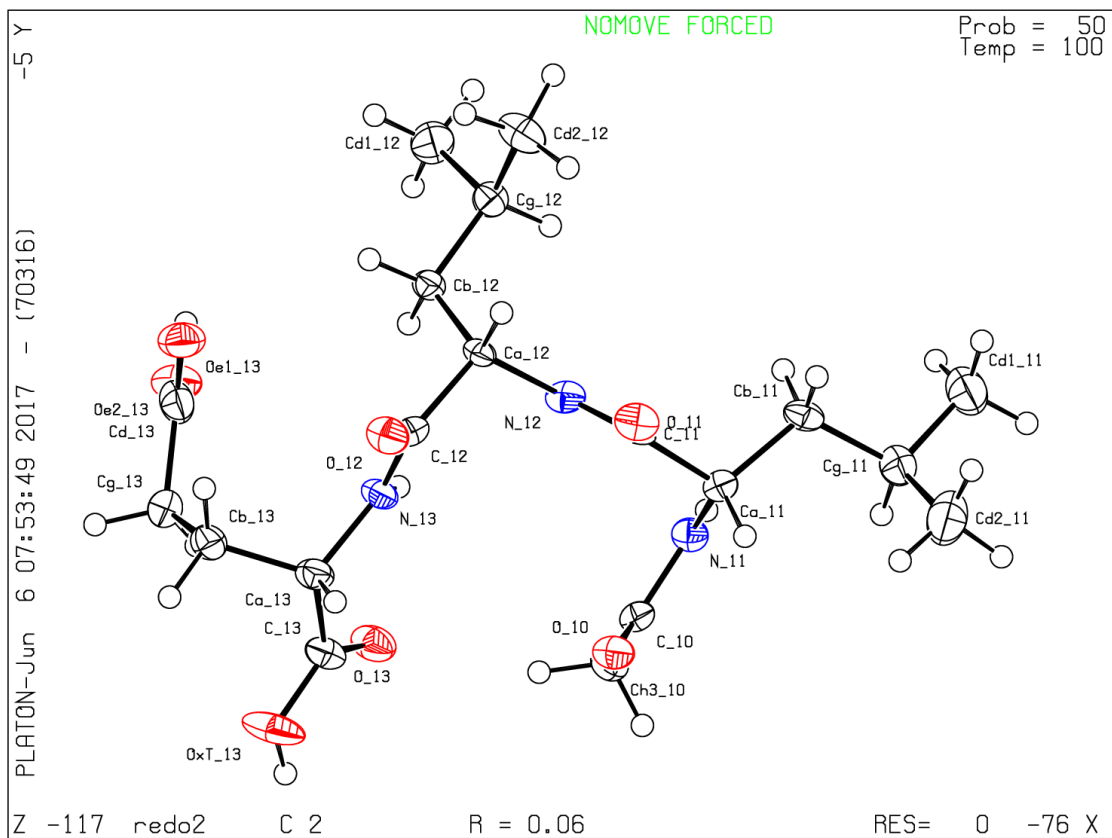

Supplement: 41598_2017_12694_MOESM1_ESM.pdf [file 41598_2017_12694_MOESM1_ESM.pdf]
