# Supplementary material for: Systematic Moiety Variations of Ultrashort Peptides Produce Profound Effects on Self-Assembly, Nanostructure Formation, Hydrogelation, and Phase Transition
Source: PubMed Central journal article supplement (PMC5635115; doi:10.1038/s41598-017-12694-9), 2017-10-10
Supplement: 41598_2017_12694_MOESM2_ESM.pdf [file 41598_2017_12694_MOESM2_ESM.pdf]

## Supporting information for:

# Systematic Moiety Variation of Ultrashort Peptides Produce Profound Effects on Self-Assembly, Nanostructure Formation, Hydrogelation, and Phase Transition

Kiat Hwa Chan<sup>1,2\*</sup>, Bo Xue<sup>3,4,5</sup>, Robert C. Robinson<sup>3,5,6</sup>, and Charlotte A. E. Hauser<sup>1,7\*\*</sup>

<sup>1</sup> Institute of Bioengineering and Nanotechnology, Biopolis, A\*STAR (Agency for Science, Technology and Research), Singapore 138669

<sup>2</sup> Division of Science, Yale-NUS College, 16 College Avenue West, Singapore 138527

<sup>3</sup> Institute of Molecular and Cell Biology, Biopolis, A\*STAR (Agency for Science, Technology and Research), Singapore 138673

<sup>4</sup> NUS Synthetic Biology for Clinical and Technological Innovation, Centre for Life Sciences, National University of Singapore, 28 Medical Drive, Singapore 117456

<sup>5</sup> Department of Biochemistry, Yong Loo Lin School of Medicine, National University of Singapore, 8 Medical Drive, Singapore 117597

<sup>6</sup> Research Institute for Interdisciplinary Science, Okayama University, Okayama 700-8530, Japan

<sup>7</sup> Laboratory for Nanomedicine, King Abdullah University of Science and Technology, Thuwal 23955-6900, Saudi Arabia

\* kiathwa.chan@yale-nus.edu.sg

\*\* charlotte.hauser@kaust.edu.sa

|                                                                     |    |
|---------------------------------------------------------------------|----|
| Contents .....                                                      | 1  |
| 1. Crystalline aliphatic peptide 1: Ac-LLE .....                    | 2  |
| 2. Crystalline aliphatic peptide 2: Ac-LVE .....                    | 5  |
| 3. Crystalline aromatic peptide: Ac-YLD .....                       | 8  |
| 4. Fibrillar aliphatic peptide 1: Ac-IVD .....                      | 10 |
| 5. Fibrillar aliphatic peptide 2: Ac-VIE .....                      | 12 |
| 6. Fibrillar aromatic peptide 1: Ac-MYD .....                       | 15 |
| 7. Fibrillar aromatic peptide 2: Ac-YYD .....                       | 18 |
| 8. Details of crystallisation, data collection and refinement ..... | 20 |

# 1. Crystalline Aliphatic Parent Tripeptide 1: Ac-LLE

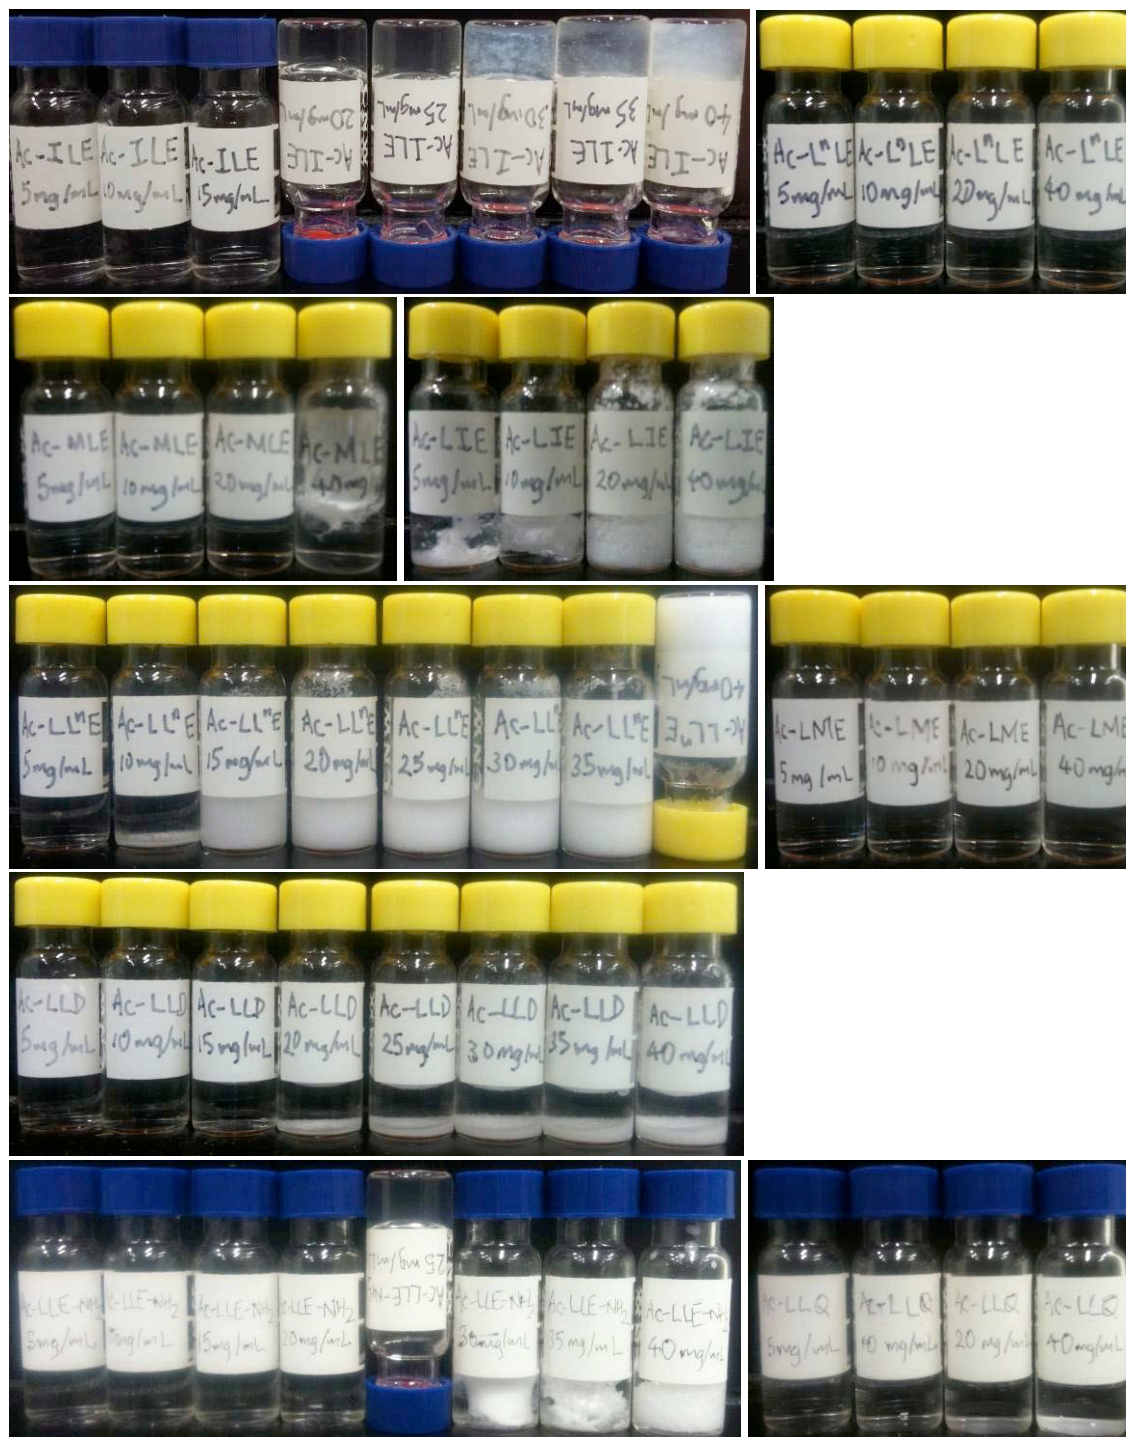

Figure S1. 1<sup>st</sup> row: Ac-ILE, Ac-L<sup>n</sup>LE; 2<sup>nd</sup> row: Ac-MLE, Ac-LIE; 3<sup>rd</sup> row: Ac-LL<sup>n</sup>E, Ac-LME; 4<sup>th</sup> row: Ac-LLD; 5<sup>th</sup> row: Ac-LLE-NH<sub>2</sub>, Ac-LLQ.

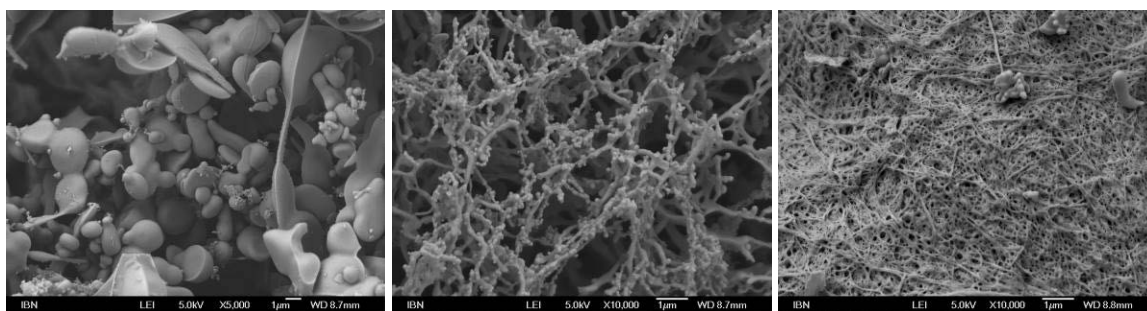

Figure S1-1. Electron micrographs of Ac-I<sup>n</sup>LE: (Left) 5 mg/mL; (middle) 20 mg/mL; (right) 40 mg/mL

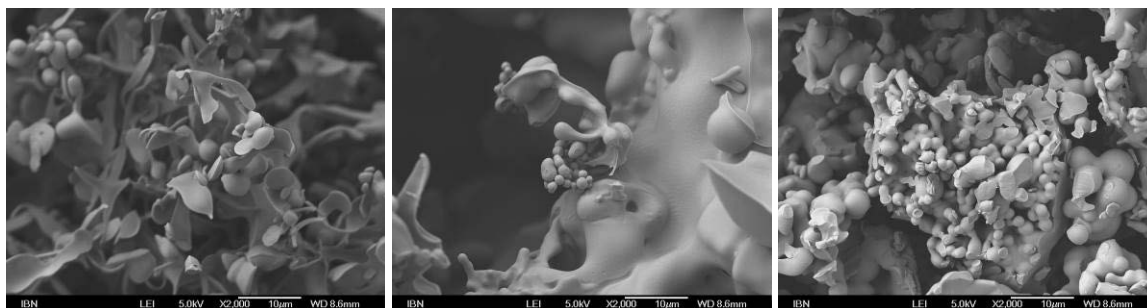

Figure S1-2. Electron micrographs of Ac-L<sup>n</sup>LE: (Left) 5 mg/mL; (middle) 20 mg/mL; (right) 40 mg/mL

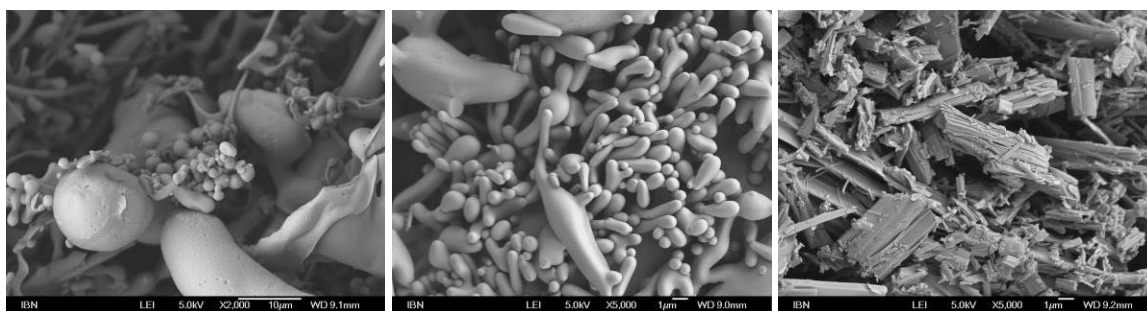

Figure S1-3. Electron micrographs of Ac-MLE: (Left) 5 mg/mL; (middle) 40 mg/mL, supernatant; (right) 40 mg/mL, precipitate (precipitation occurred after more than one month on standing)

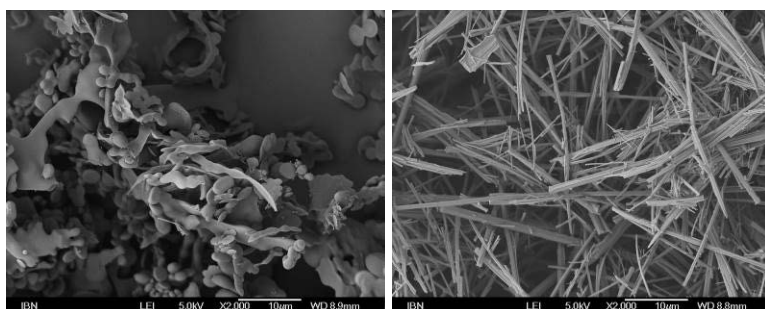

Figure S1-4. Electron micrographs of Ac-LIE: (Left) 5 mg/mL, supernatant; (middle) 5 mg/mL, precipitate; (right)

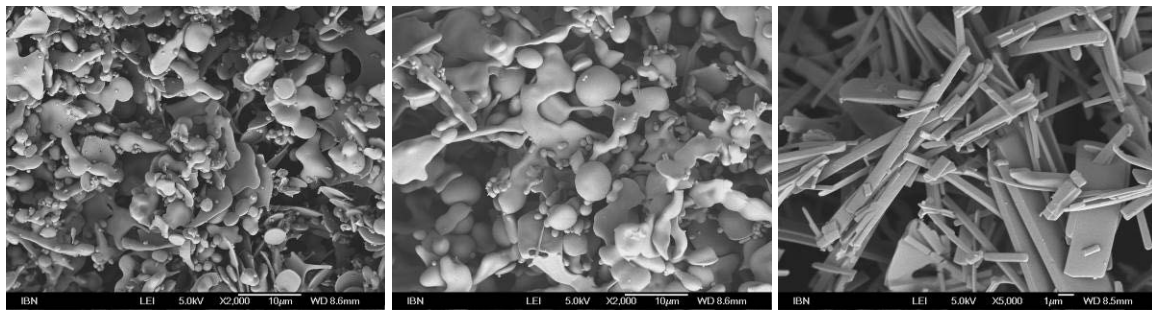

Figure S1-5. Electron micrographs of Ac-LL<sup>n</sup>E: (Left) 5 mg/mL; (middle) 20 mg/mL, supernatant; (right) 20 mg/mL, precipitate

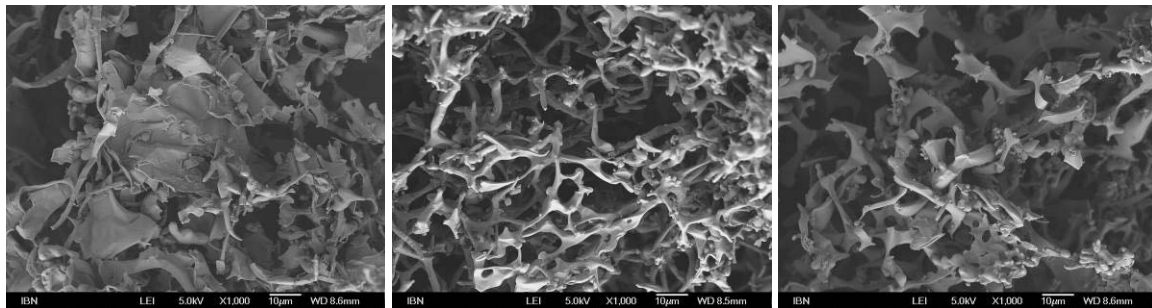

Figure S1-6. Electron micrographs of Ac-LME: (Left) 5 mg/mL; (middle) 20 mg/mL; (right) 40 mg/mL

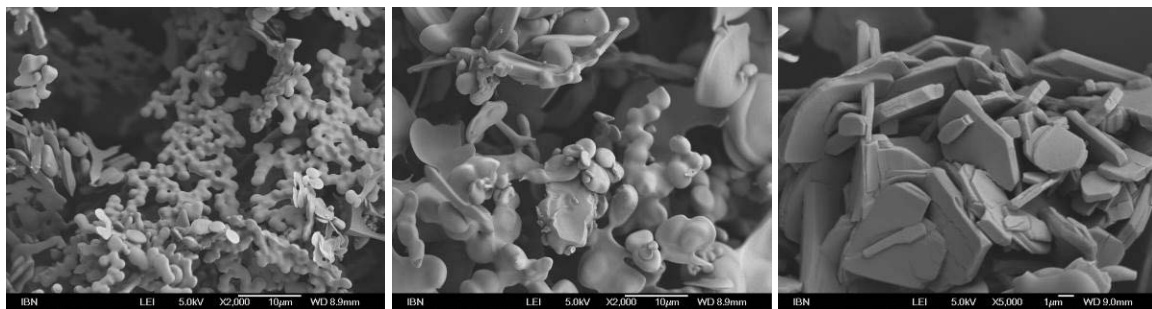

Figure S1-7. Electron micrographs of Ac-LLD: (Left) 5 mg/mL; (middle) 20 mg/mL, supernatant; (right) 20 mg/mL, precipitate

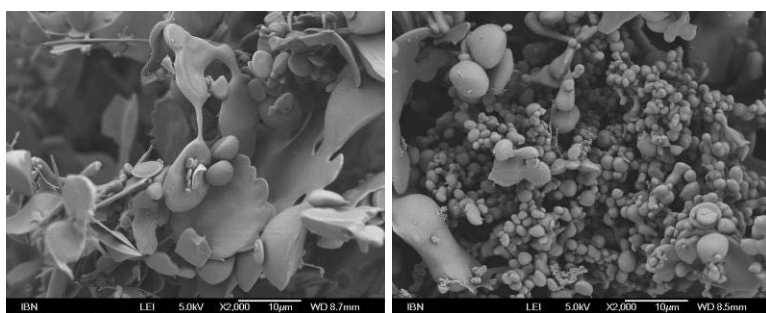

Figure S1-8. Electron micrographs of Ac-LLE-NH<sub>2</sub>: (Left) 5 mg/mL; (right) 20 mg/mL

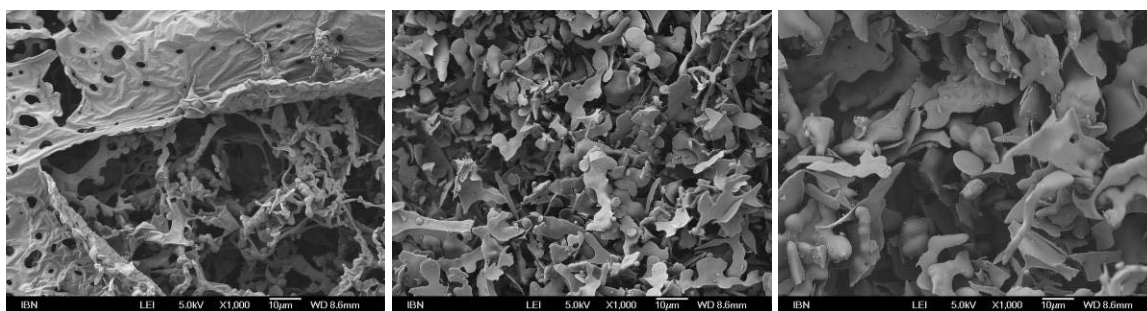

Figure S1-9. Electron micrographs of Ac-LLQ: (Left) 5 mg/mL; (middle) 20 mg/mL; (right) 40 mg/mL

## 2. Crystalline Aliphatic Parent Tripeptide 2: Ac-LVE

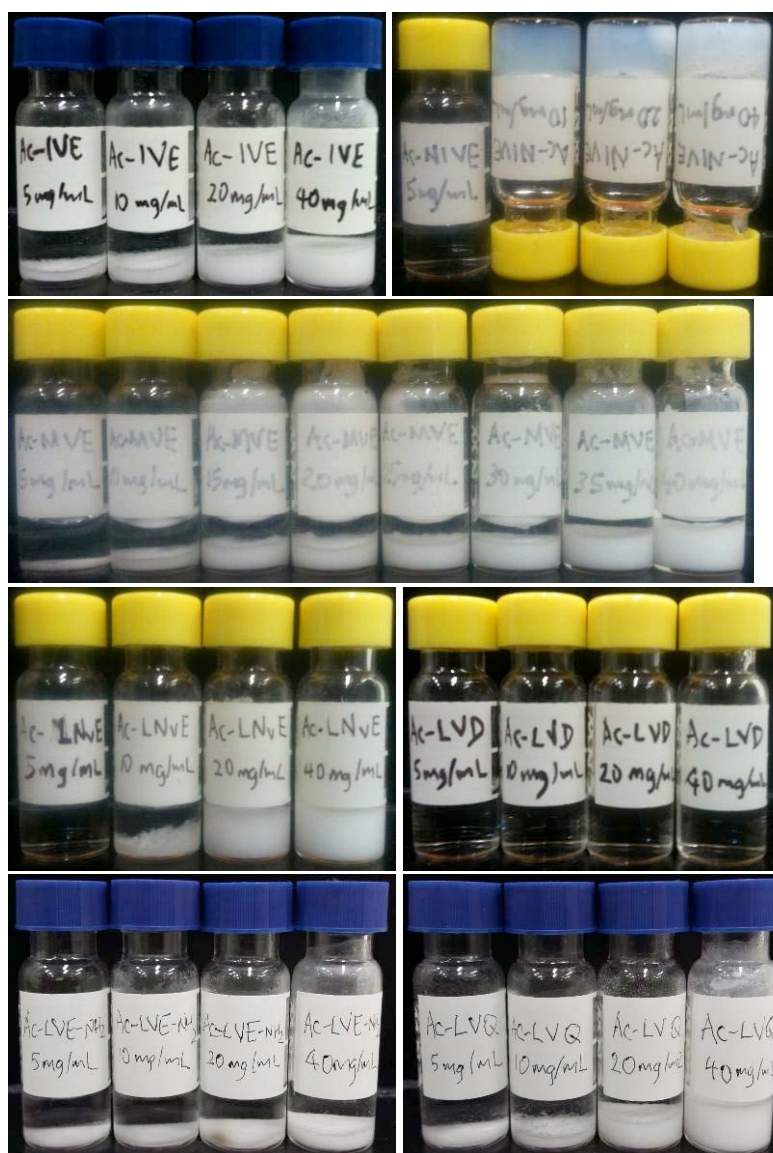

Figure S2. 1<sup>st</sup> row: Ac-IVE, Ac-L<sup>n</sup>VE; 2<sup>nd</sup> row: Ac-MVE; 3<sup>rd</sup> row: Ac-LV<sup>n</sup>E, Ac-LVD; 4<sup>th</sup> row: Ac-LVE-NH<sub>2</sub>, Ac-LVQ.

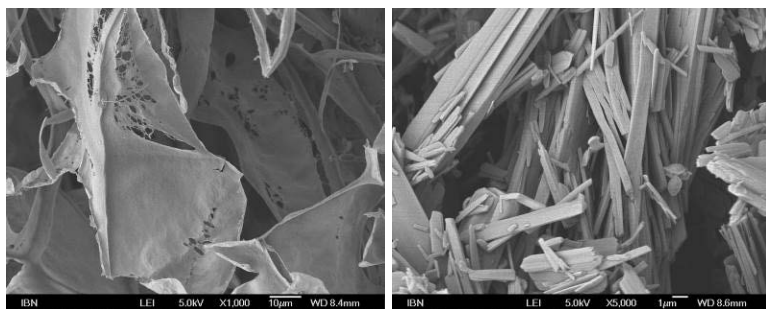

Figure S2-1. Electron micrographs of Ac-IVE: (Left) 5 mg/mL, supernatant; (right) 5 mg/mL, precipitate

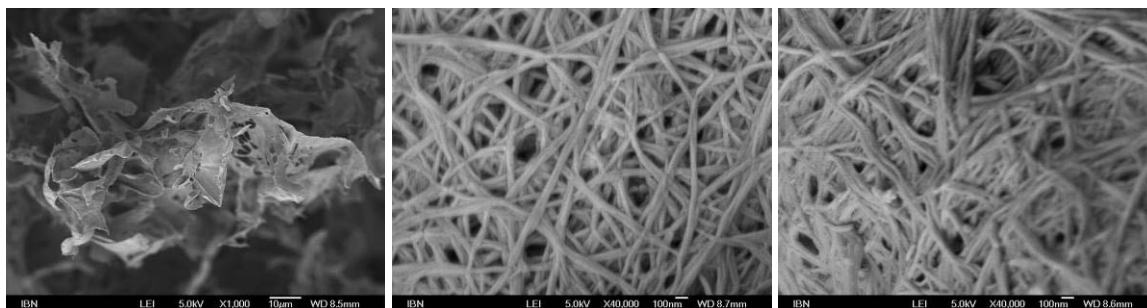

Figure S2-2. Electron micrographs of Ac-L<sup>n</sup>VE: (Left) 5 mg/mL; (middle) 20 mg/mL; (right) 40 mg/mL

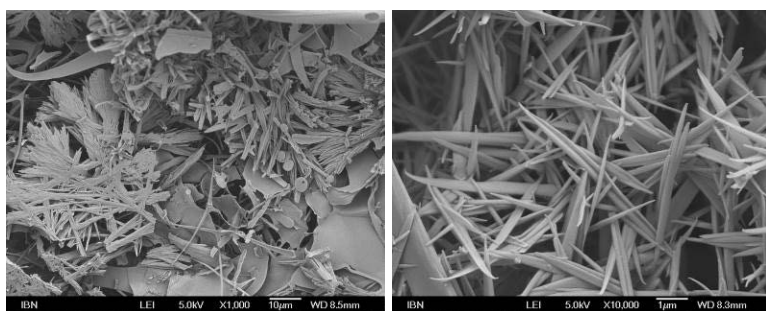

Figure S2-3. Electron micrographs of Ac-MVE: (Left) 5 mg/mL, supernatant; (right) 5 mg/mL, precipitate

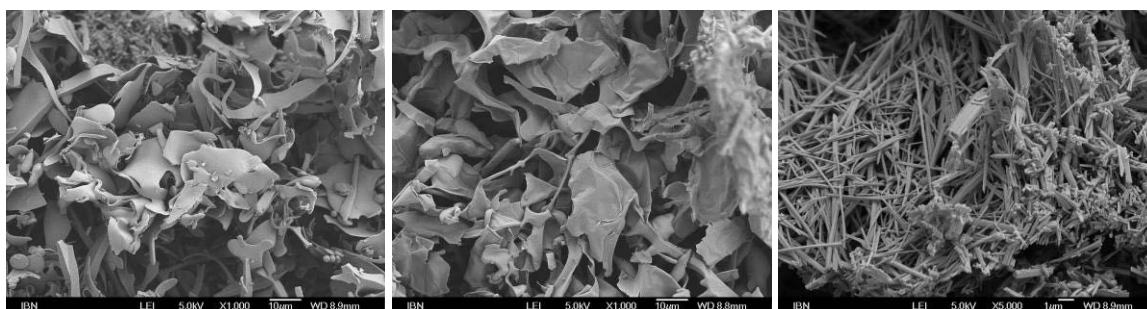

Figure S2-4. Electron micrographs of Ac-LV<sup>n</sup>E: (Left) 5 mg/mL; (middle) 20 mg/mL, supernatant; (right) 20 mg/mL, precipitate (note biphasic distribution of crystallites and fibrils)

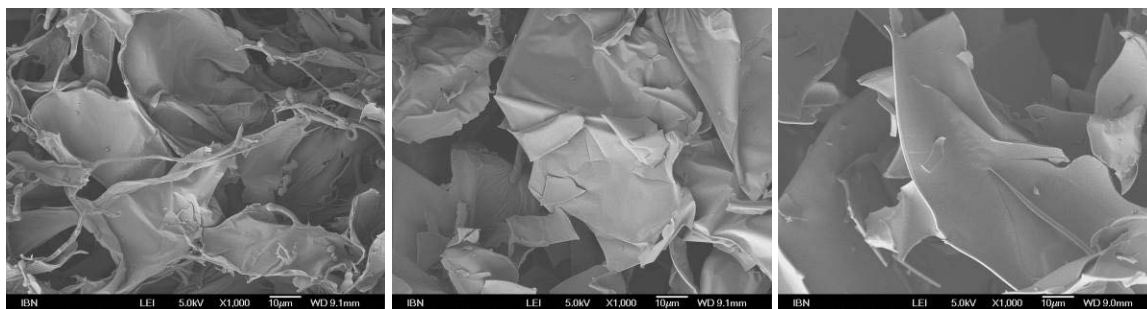

Figure S2-5. Electron micrographs of Ac-LVD: (Left) 5 mg/mL; (middle) 20 mg/mL; (right) 40 mg/mL

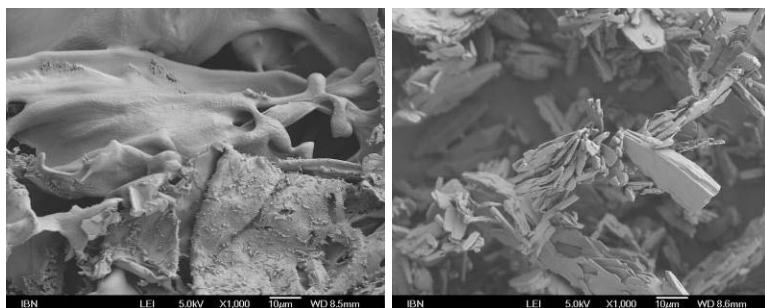

Figure S2-6. Electron micrographs of Ac-LVE-NH<sub>2</sub>: (Left) 5 mg/mL, supernatant; (right) 5 mg/mL, precipitate

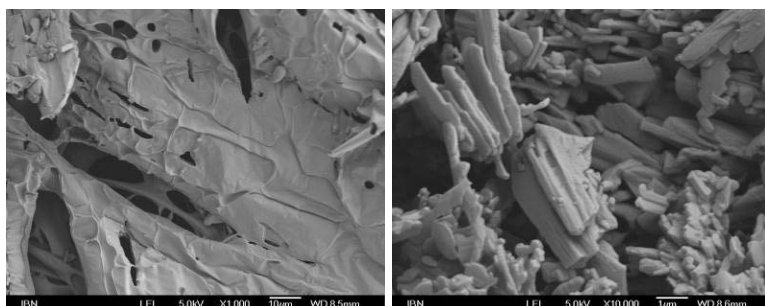

Figure S2-7. Electron micrographs of Ac-LVQ: (Left) 5 mg/mL, supernatant; (right) 5 mg/mL, precipitate

### 3. Crystalline Aromatic Parent Tripeptide: Ac-YLD

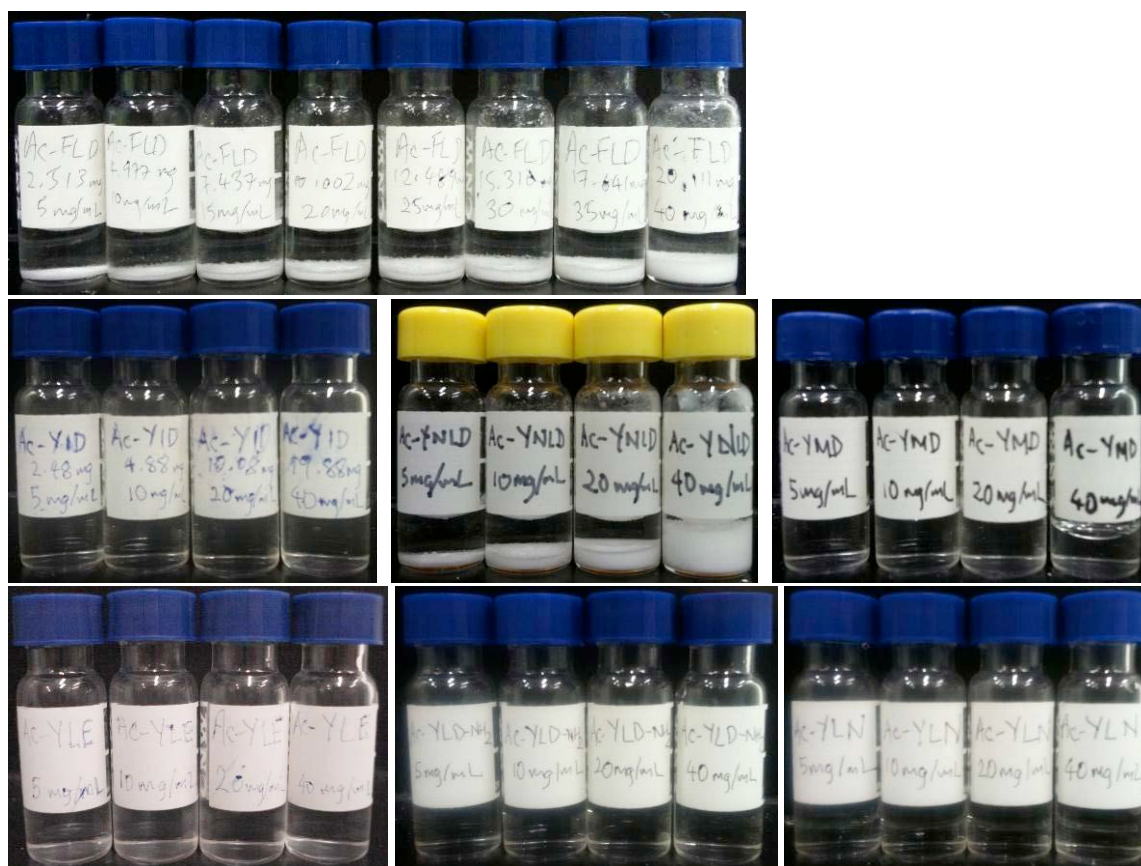

Figure S3. 1<sup>st</sup> row: Ac-FLD; 2<sup>nd</sup> row: Ac-YLD, Ac-YLD, Ac-YMD; 3<sup>rd</sup> row: Ac-YLE, Ac-YLD-NH<sub>2</sub>, Ac-YLN.

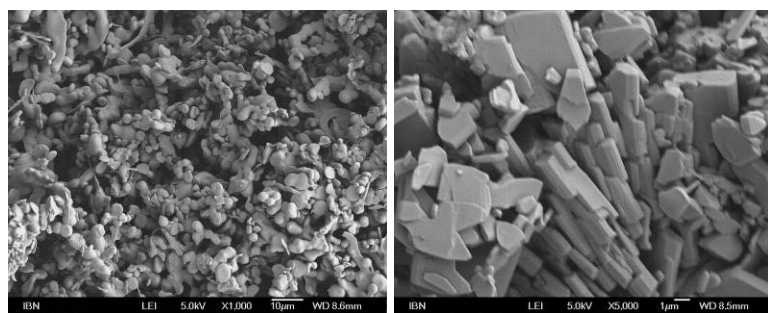

Figure S3-1. Electron micrographs of Ac-FLD: (Left) 5 mg/mL, supernatant; (right) 5 mg/mL, precipitate

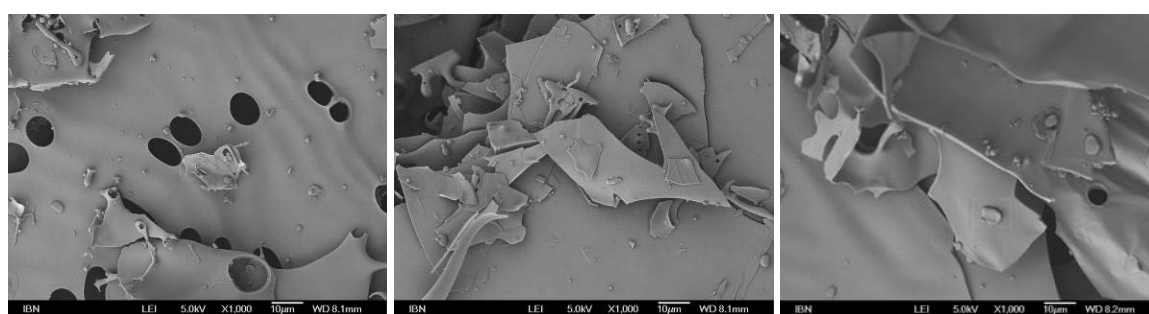

Figure S3-2. Electron micrographs of Ac-YLD: (Left) 5 mg/mL; (middle) 20 mg/mL; (right) 40 mg/mL



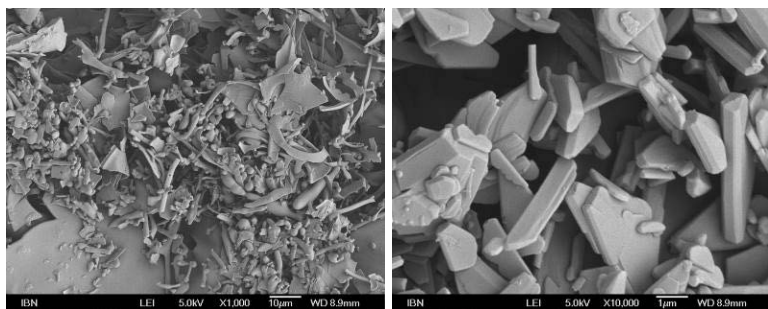

Figure S3-3. Electron micrographs of Ac-YL<sup>n</sup>D: (Left) 5 mg/mL, supernatant; (right) 5 mg/mL, precipitate

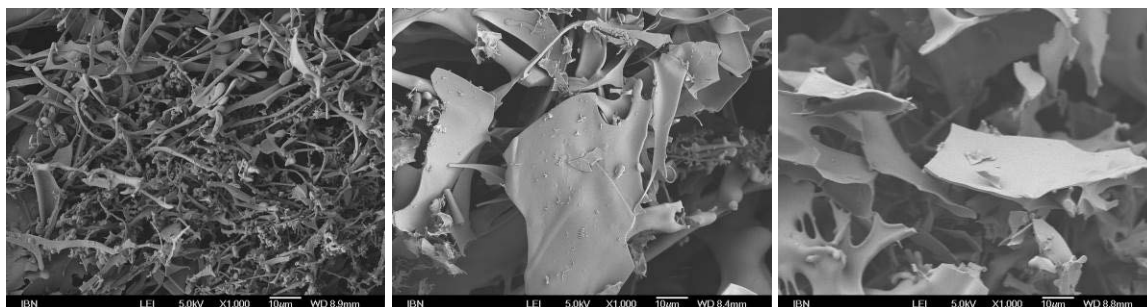

Figure S3-4. Electron micrographs of Ac-YMD: (Left) 5 mg/mL; (middle) 20 mg/mL; (right) 40 mg/mL

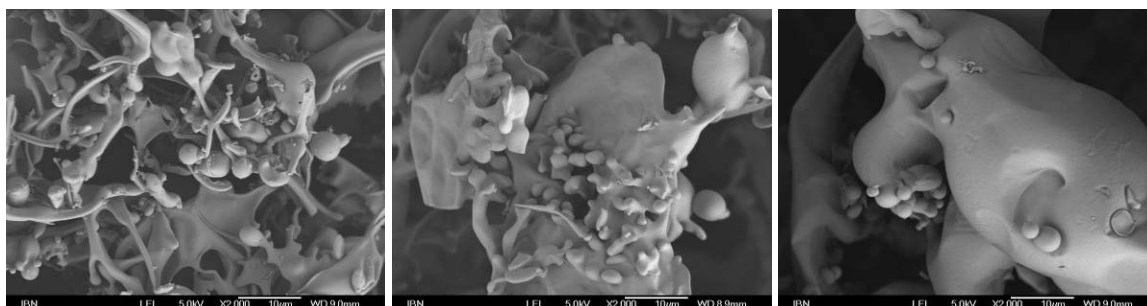

Figure S3-5. Electron micrographs of Ac-YLE: (Left) 5 mg/mL; (middle) 20 mg/mL; (right) 40 mg/mL

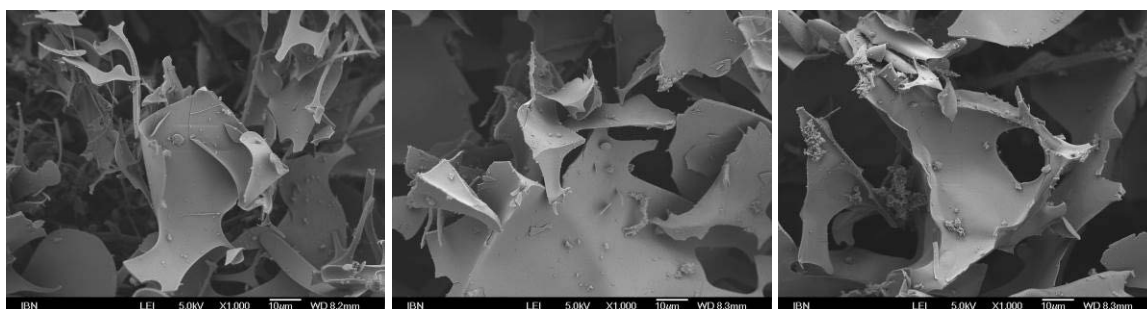

Figure S3-6. Electron micrographs of Ac-YLD-NH<sub>2</sub>: (Left) 5 mg/mL; (middle) 20 mg/mL; (right) 40 mg/mL

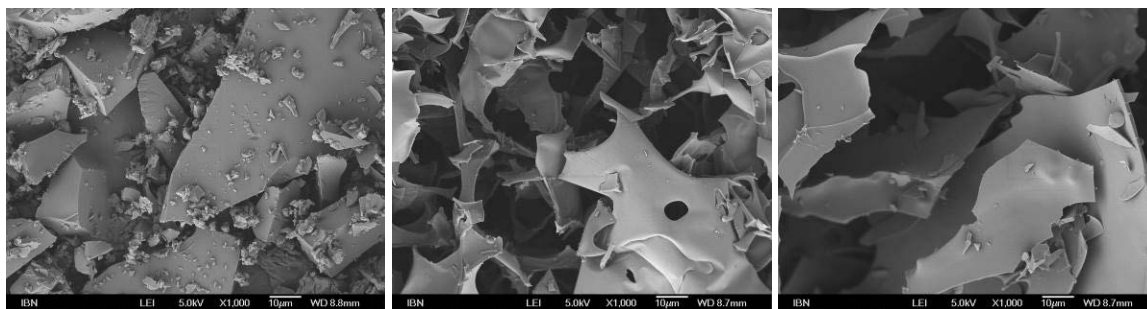

Figure S3-7. Electron micrographs of Ac-YLN: (Left) 5 mg/mL; (middle) 20 mg/mL; (right) 40 mg/mL

#### 4. Fibrillar Aliphatic Parent Tripeptide 1: Ac-IVD

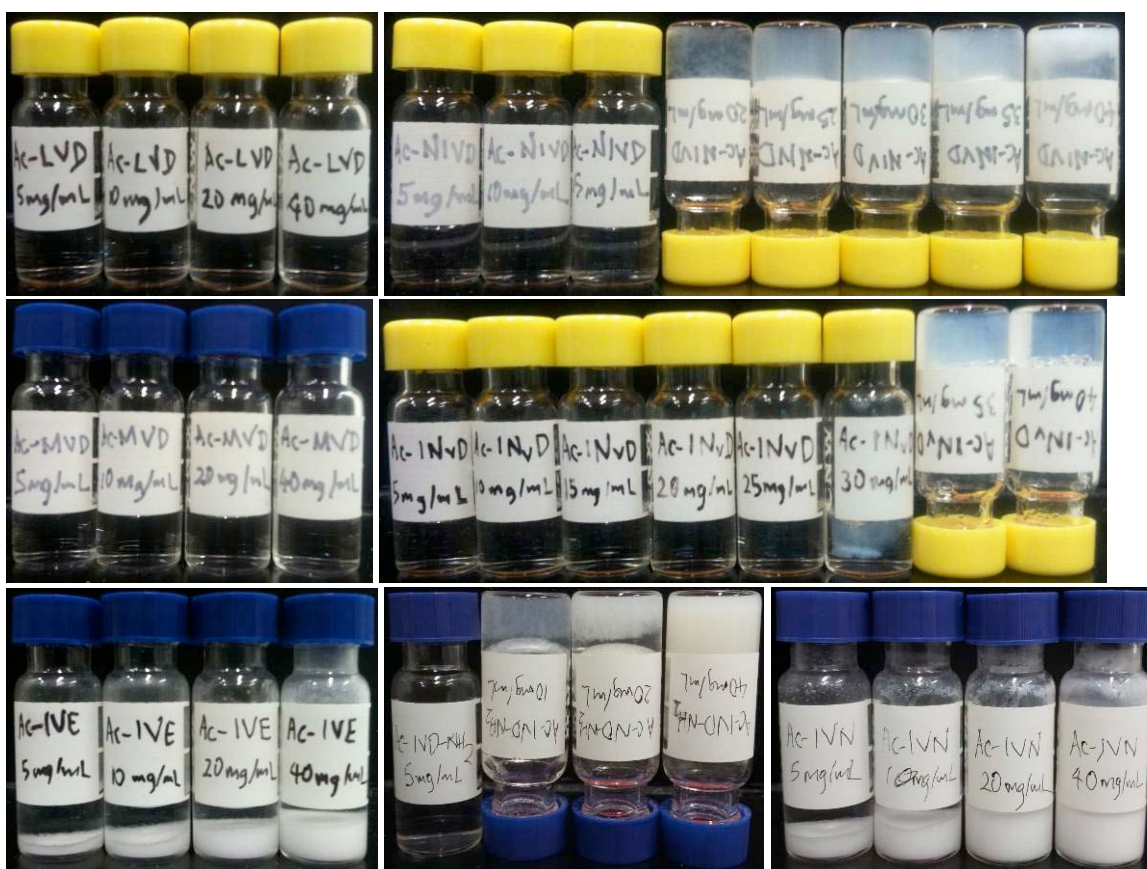

Figure S4. 1<sup>st</sup> row: Ac-LVD, Ac-L<sup>n</sup>VD; 2<sup>nd</sup> row: Ac-MVD, Ac-IV<sup>n</sup>D; 3<sup>rd</sup> row: Ac-IVE, Ac-IVD-NH<sub>2</sub>, Ac-IVN.

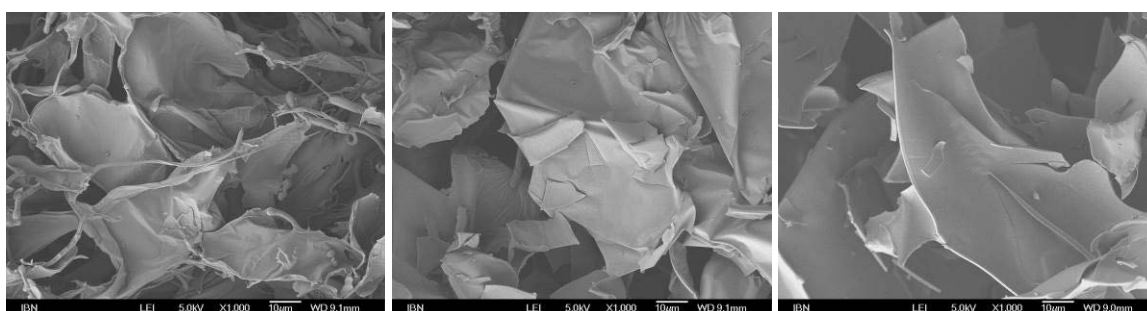

Figure S4-1. Electron micrographs of Ac-LVD: (Left) 5 mg/mL; (middle) 20 mg/mL; (right) 40 mg/mL

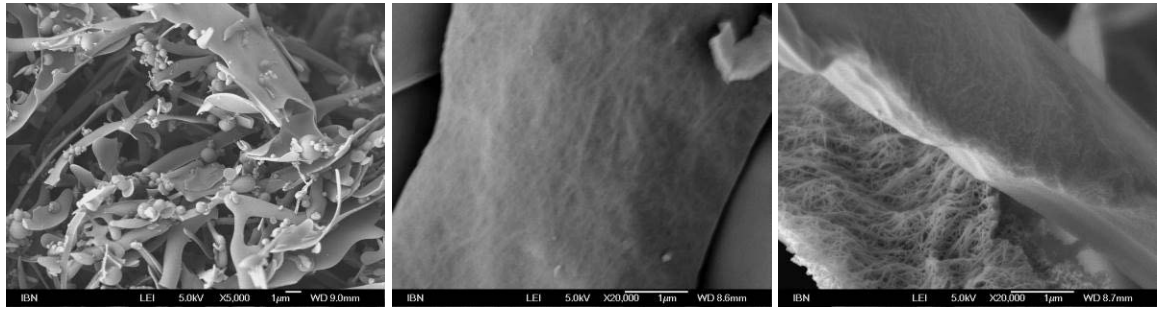

Figure S4-2. Electron micrographs of Ac-L<sup>n</sup>VD: (Left) 5 mg/mL; (middle) 20 mg/mL; (right) 40 mg/mL

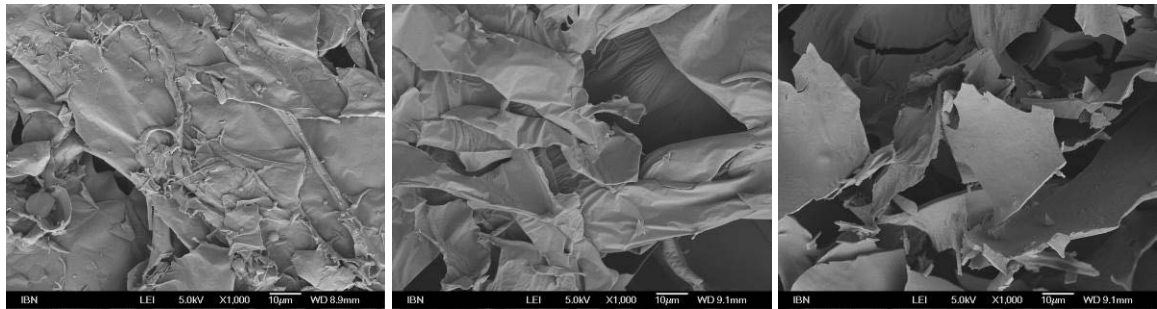

Figure S4-3. Electron micrographs of Ac-MVD: (Left) 5 mg/mL; (middle) 20 mg/mL; (right) 40 mg/mL

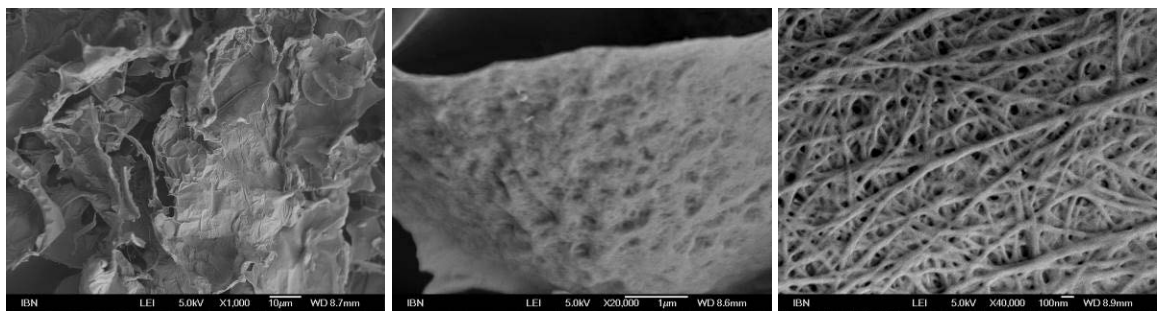

Figure S4-4. Electron micrographs of Ac-IV<sup>n</sup>D: (Left) 5 mg/mL; (middle) 20 mg/mL; (right) 40 mg/mL

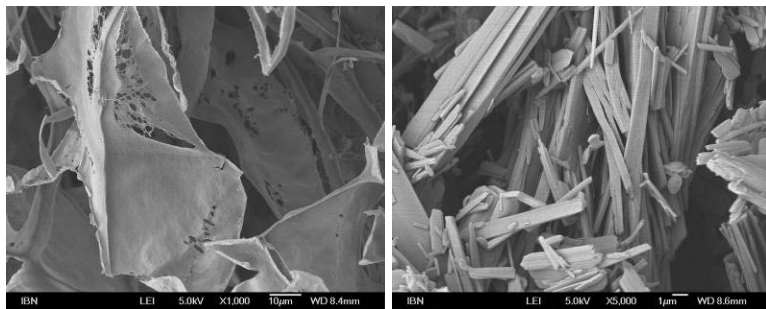

Figure S4-5. Electron micrographs of Ac-IVE: (Left) 5 mg/mL, supernatant; (right) 5 mg/mL, precipitate

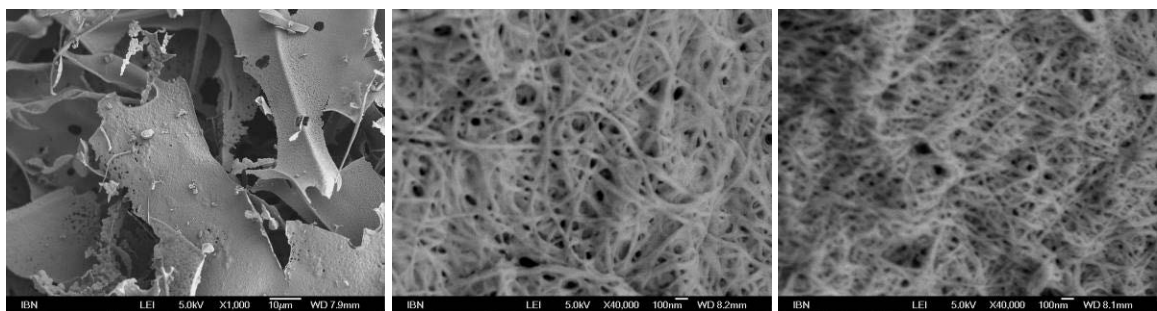

Figure S4-6. Electron micrographs of Ac-IVD-NH<sub>2</sub>: (Left) 5 mg/mL; (middle) 20 mg/mL; (right) 40 mg/mL

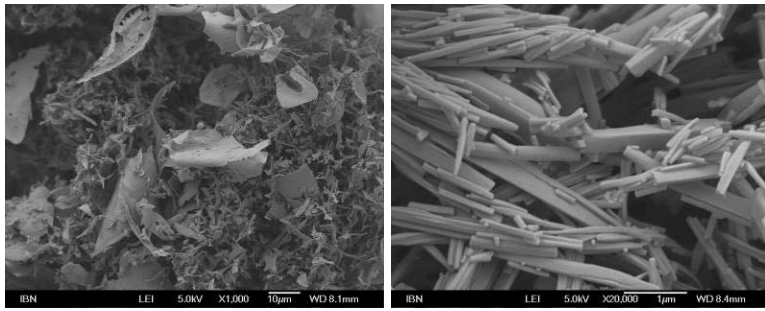

Figure S4-7. Electron micrographs of Ac-IVN: (Left) 5 mg/mL, supernatant; (right) 5 mg/mL, precipitate

### 5. Fibrillar Aliphatic Parent Tripeptide 2: Ac-VIE

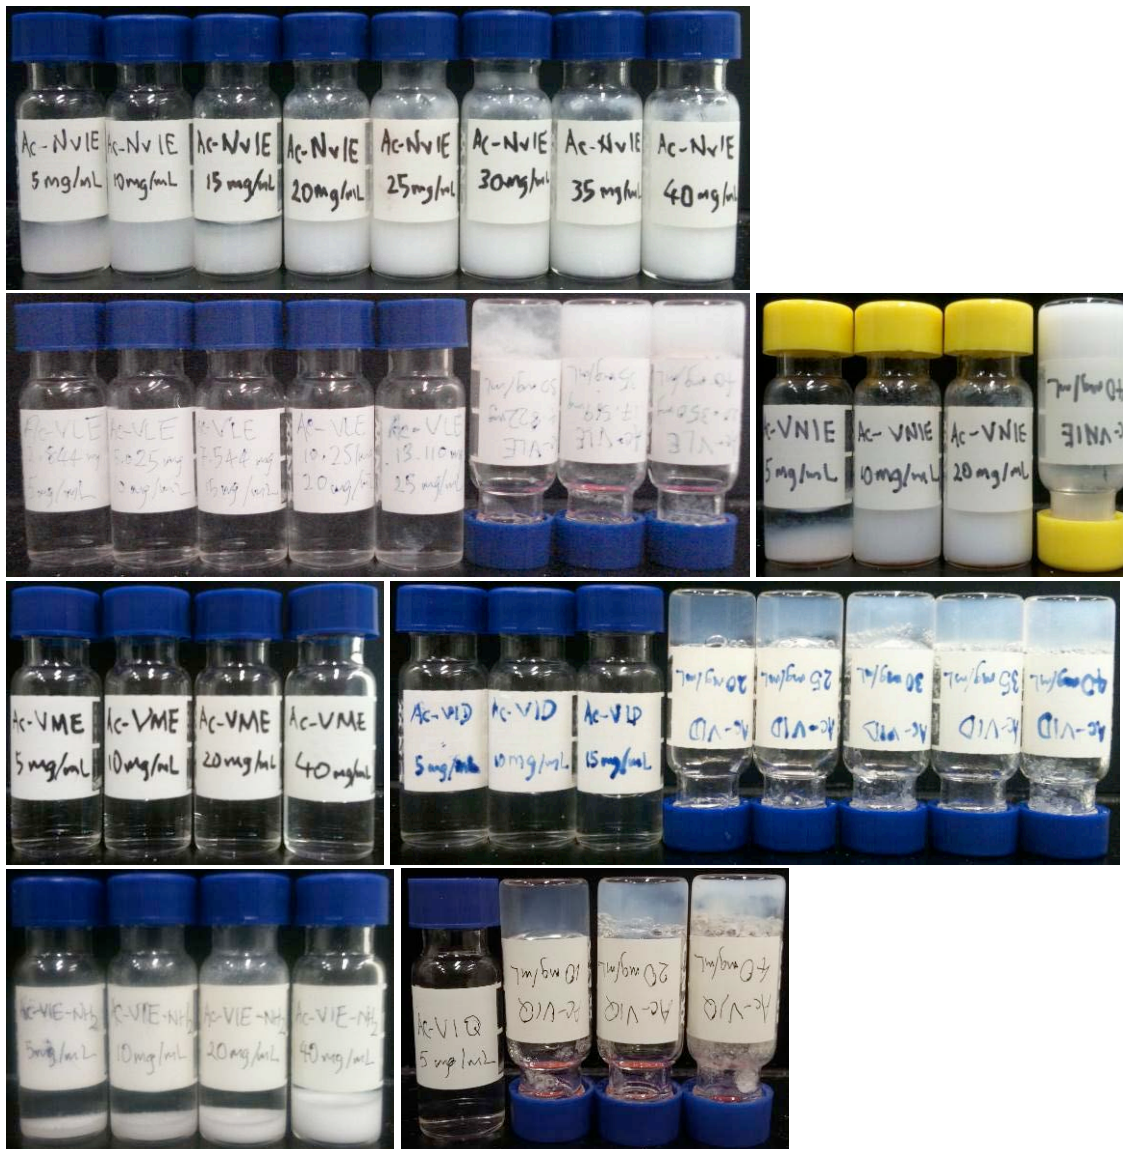

Figure S5. 1<sup>st</sup> row: Ac-V<sup>n</sup>IE; 2<sup>nd</sup> row: Ac-VLE, Ac-VL<sup>n</sup>E; 3<sup>rd</sup> row: Ac-VME, Ac-VID; 4<sup>th</sup> row: Ac-VIE-NH<sub>2</sub>, Ac-VIQ.

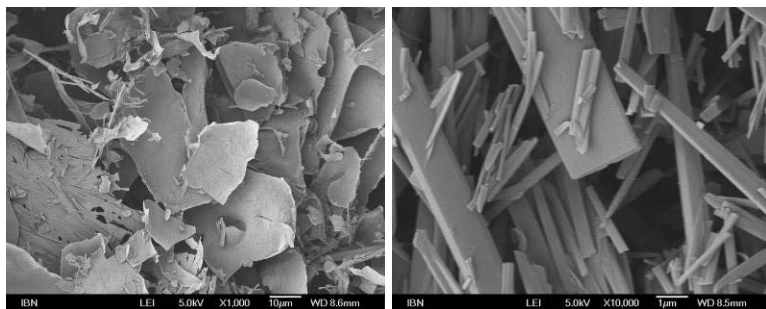

Figure S5-1. Electron micrographs of Ac-V<sup>0</sup>IE: (Left) 5 mg/mL, supernatant; (right) 5 mg/mL, precipitate

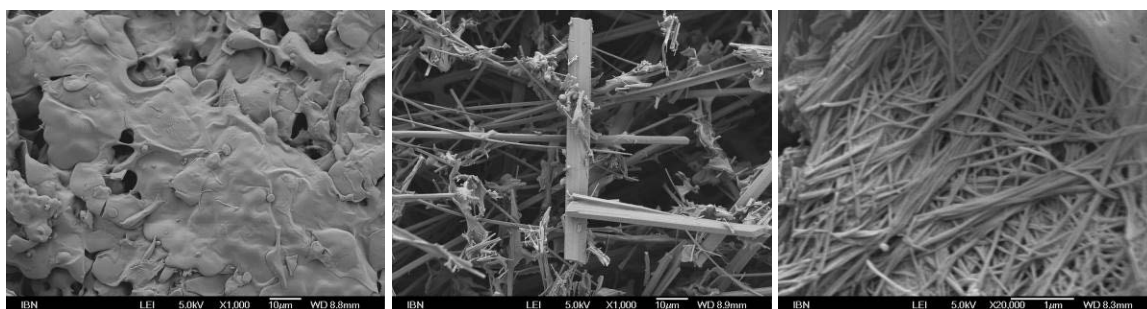

Figure S5-2. Electron micrographs of Ac-VLE: (Left) 20 mg/mL, supernatant; (middle) 20 mg/mL, precipitate; (right) 40 mg/mL

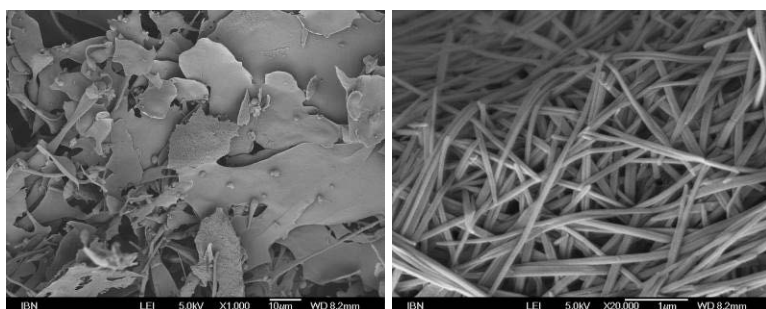

Figure S5-3. Electron micrographs of Ac-VL<sup>0</sup>E: (Left) 5 mg/mL, supernatant; (right) 5 mg/mL, precipitate

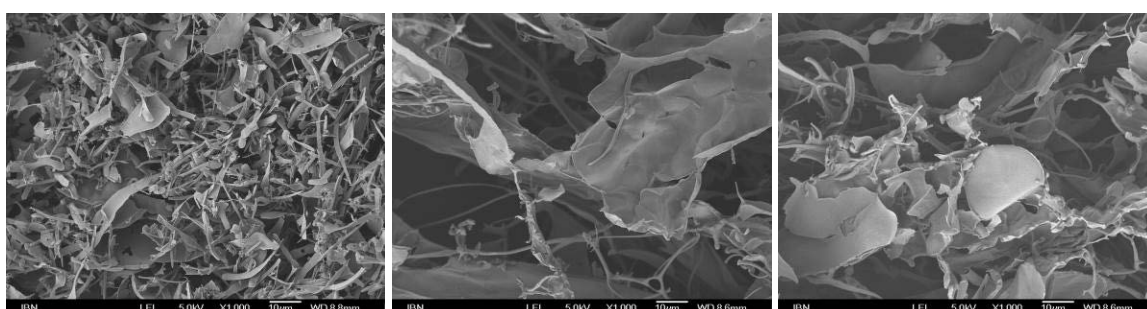

Figure S5-4. Electron micrographs of Ac-VME: (Left) 5 mg/mL; (middle) 20 mg/mL; (right) 40 mg/mL

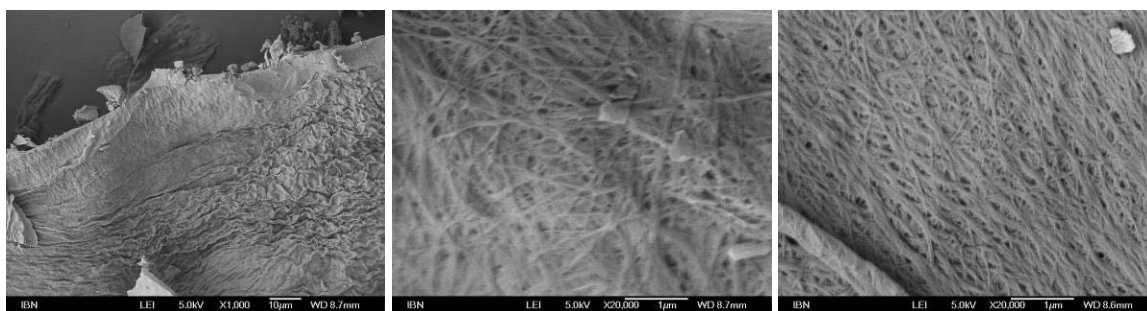

Figure S5-5. Electron micrographs of Ac-VID: (Left) 5 mg/mL; (middle) 20 mg/mL; (right) 40 mg/mL

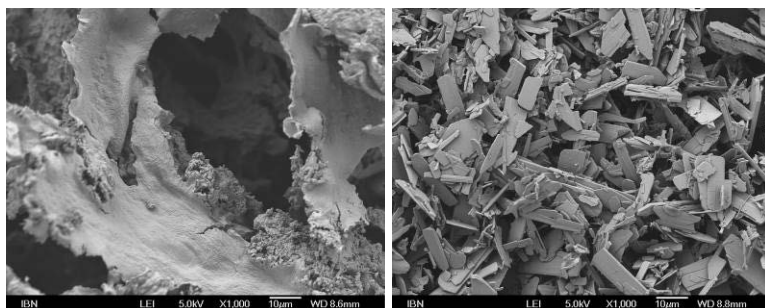

Figure S5-6. Electron micrographs of Ac-VIE-NH<sub>2</sub>: (Left) 5 mg/mL, supernatant; (right) 5 mg/mL, precipitate

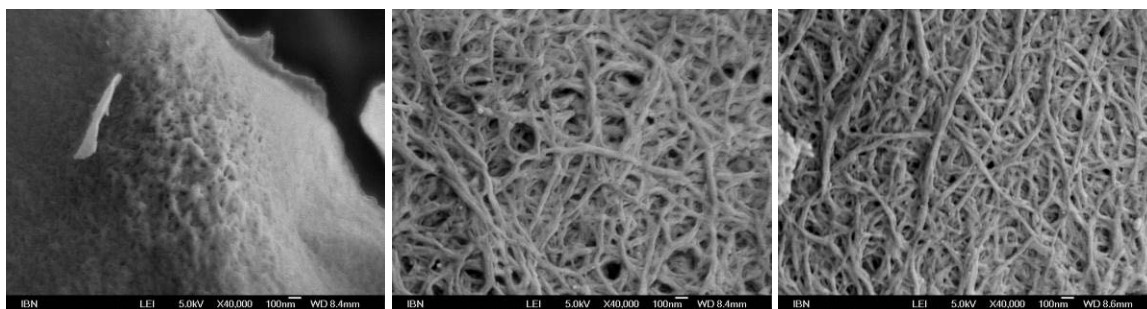

Figure S5-7. Electron micrographs of Ac-VIQ: (Left) 5 mg/mL; (middle) 20 mg/mL; (right) 40 mg/mL

## 6. Fibrillar Aromatic Parent Tripeptide 1: Ac-MYD

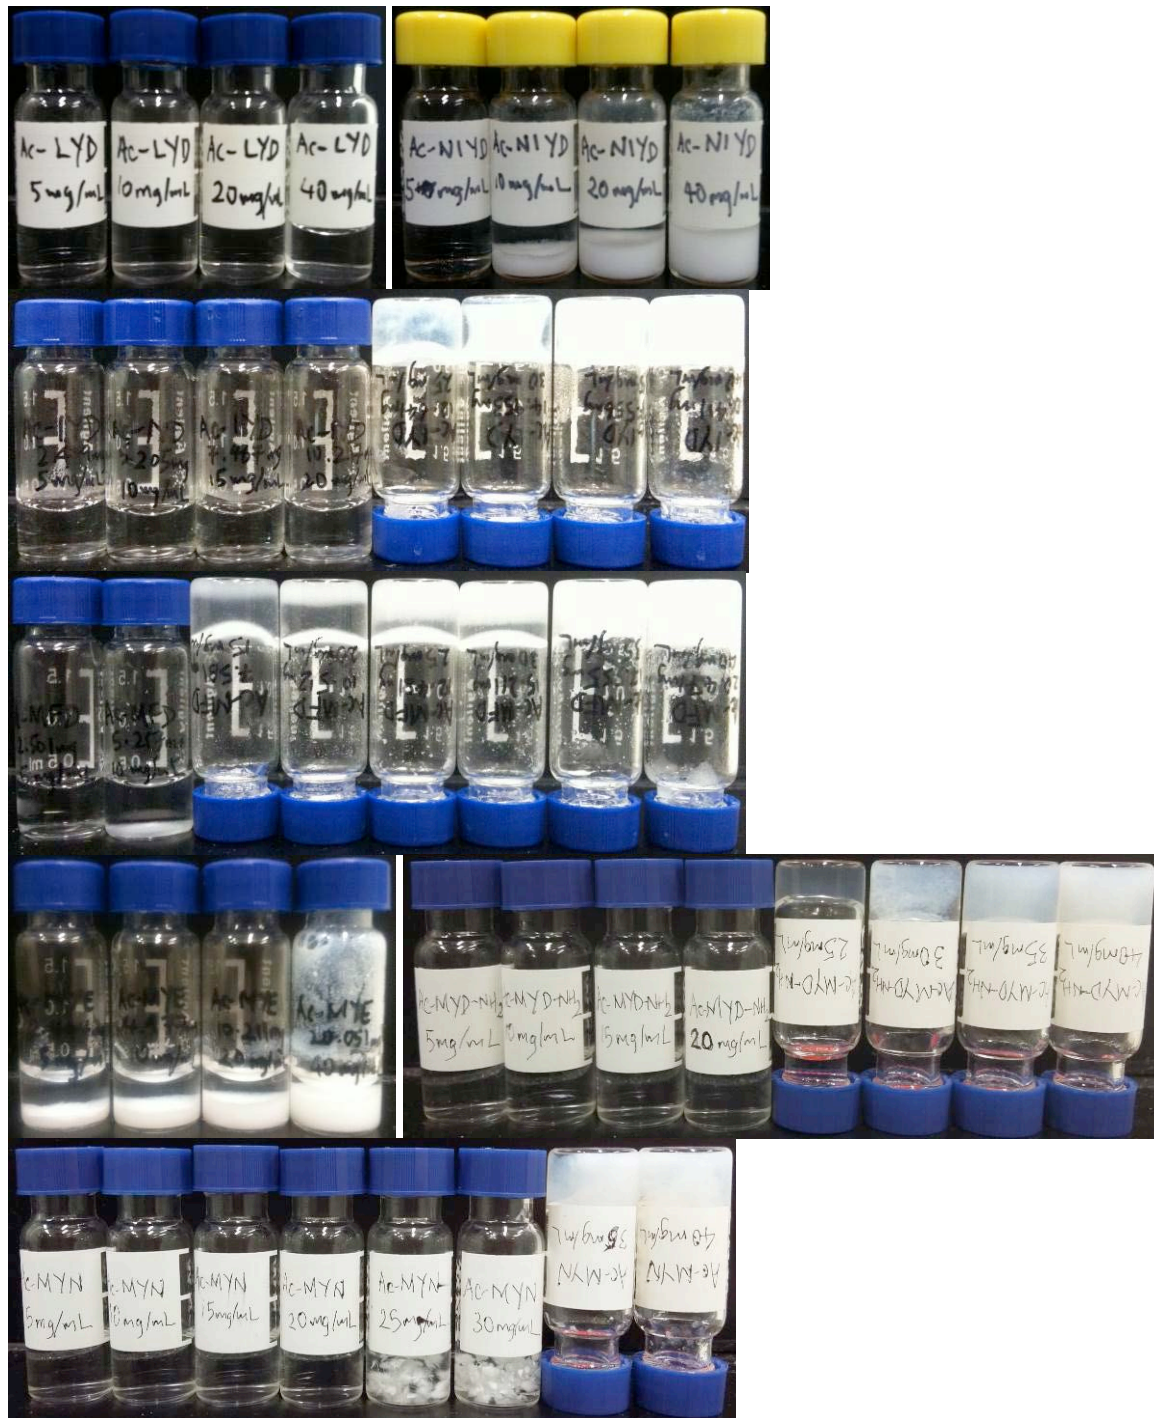

Figure S6. 1<sup>st</sup> row: Ac-IYD, Ac-LYD; 2<sup>nd</sup> row: Ac-L<sup>n</sup>YD, Ac-MFD; 3<sup>rd</sup> row: Ac-MYE, Ac-MYD-NH<sub>2</sub>; 4<sup>th</sup> row: Ac-MYN.

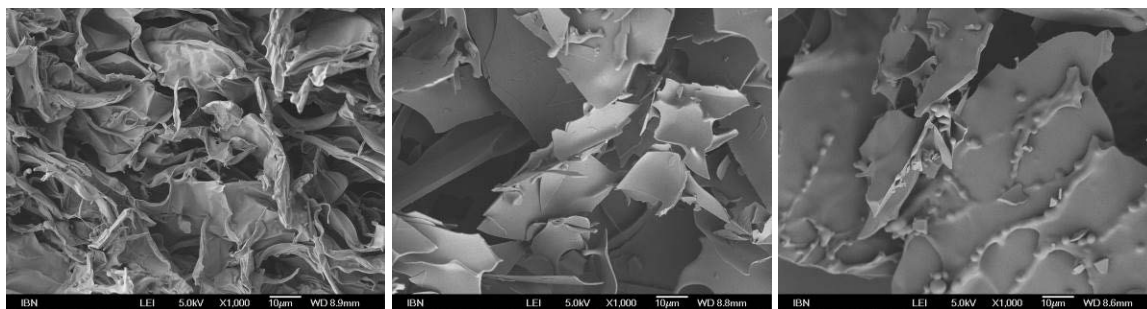

Figure S6-1. Electron micrographs of Ac-LYD: (Left) 5 mg/mL; (middle) 20 mg/mL; (right) 40 mg/mL

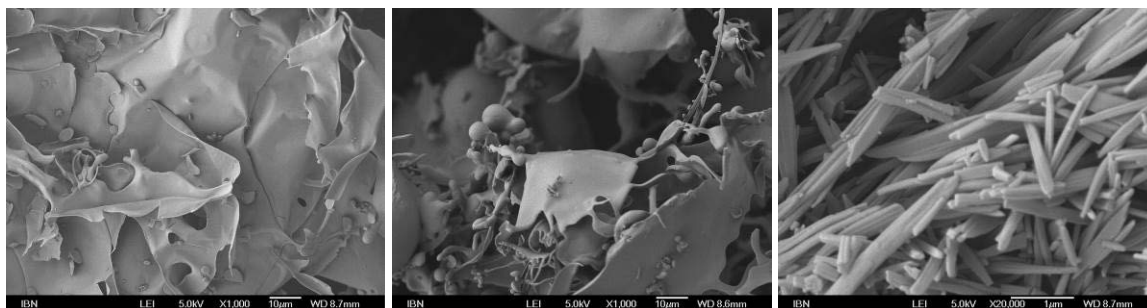

Figure S6-2. Electron micrographs of Ac-L<sup>n</sup>YD: (Left) 5 mg/mL; (middle) 10 mg/mL, supernatant; (right) 10 mg/mL, precipitate

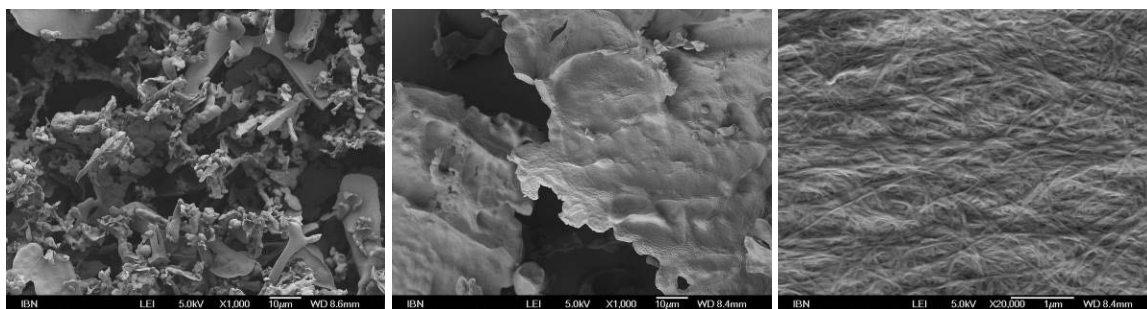

Figure S6-3. Electron micrographs of Ac-IYD: (Left) 5 mg/mL; (middle) 20 mg/mL, supernatant; (right) 20 mg/mL, precipitate

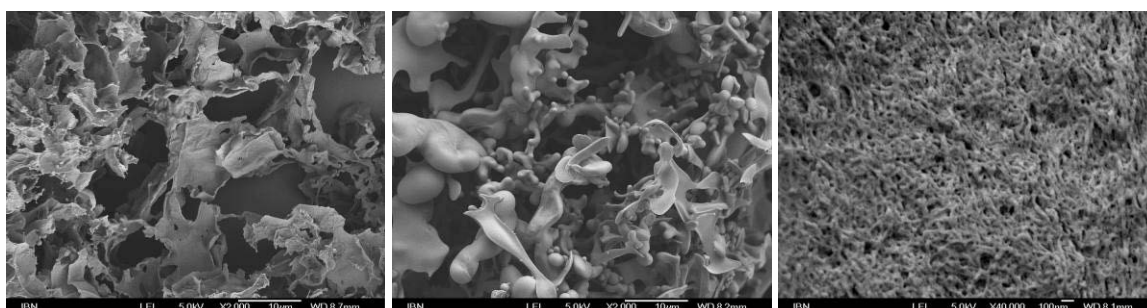

Figure S6-4. Electron micrographs of Ac-MFD: (Left) 5 mg/mL; (middle) 20 mg/mL, supernatant; (right) 20 mg/mL, precipitate



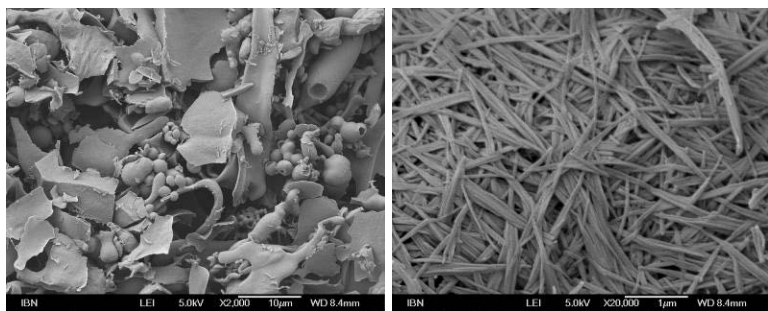

Figure S6-5. Electron micrographs of Ac-MYE: (Left) 5 mg/mL, supernatant; (right) 5 mg/mL, precipitate

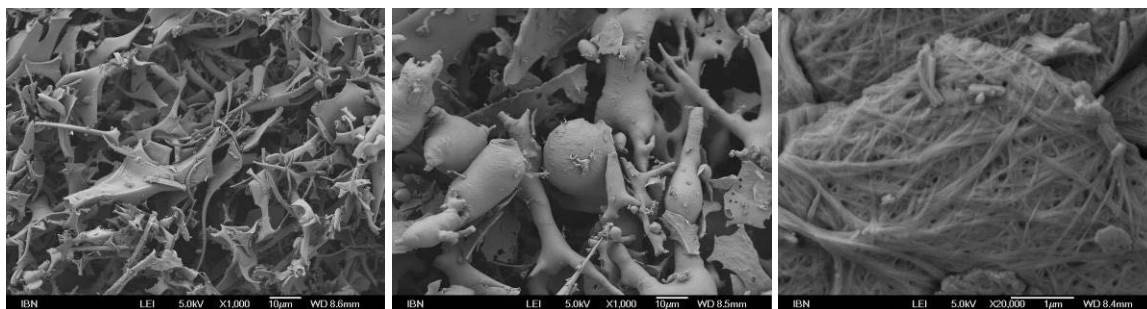

Figure S6-6. Electron micrographs of Ac-MYD-NH<sub>2</sub>: (Left) 5 mg/mL; (middle) 20 mg/mL; (right) 40 mg/mL

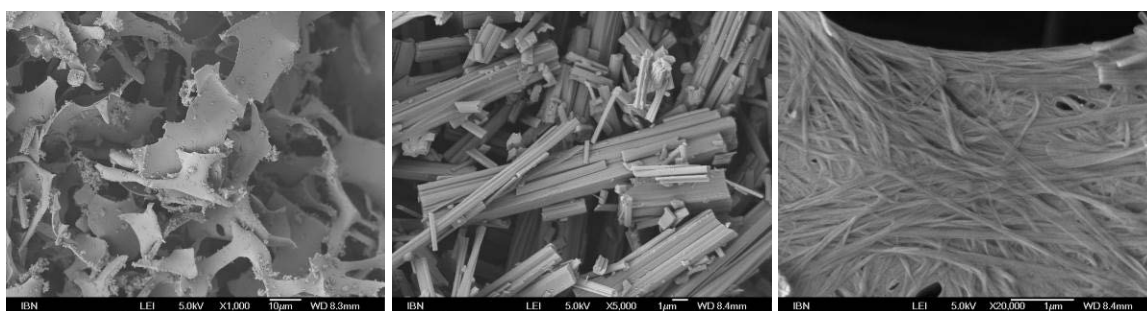

Figure S6-7. Electron micrographs of Ac-MYN: (Left) 40 mg/mL, supernatant; (middle) 40 mg/mL, precipitate (right) 40 mg/mL (which gelled after prolonged sonication)

## 7. Fibrillar Aromatic Parent Tripeptide 2: Ac-YYD

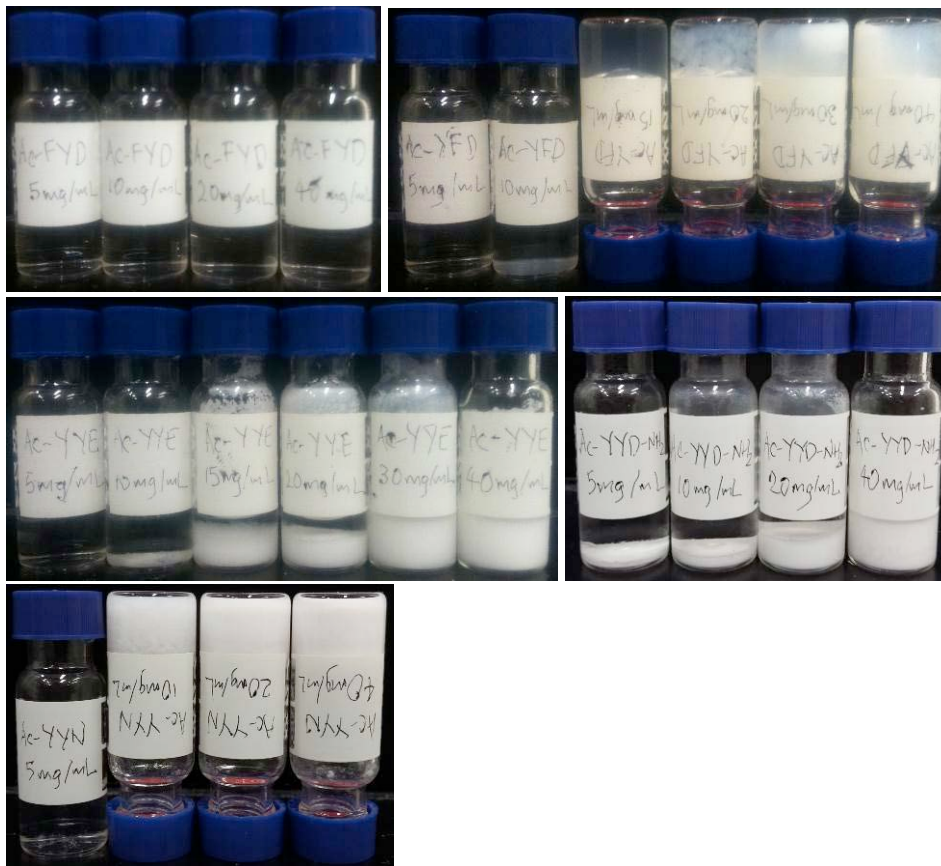

Figure. 1<sup>st</sup> row: Ac-FYD, Ac-YFD; 2<sup>nd</sup> row: Ac-YYE, Ac-YYD-NH<sub>2</sub>; 3<sup>rd</sup> row: Ac-YYN.

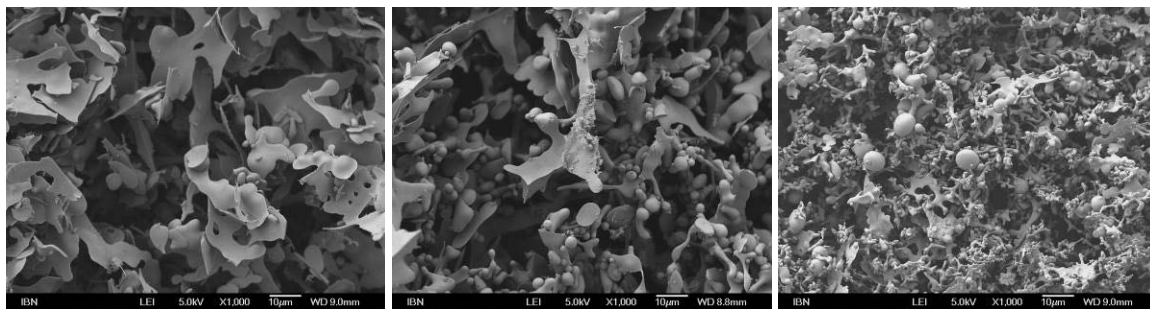

Figure S7-1. Electron micrographs of Ac-FYD: (Left) 5 mg/mL; (middle) 20 mg/mL; (right) 40 mg/mL

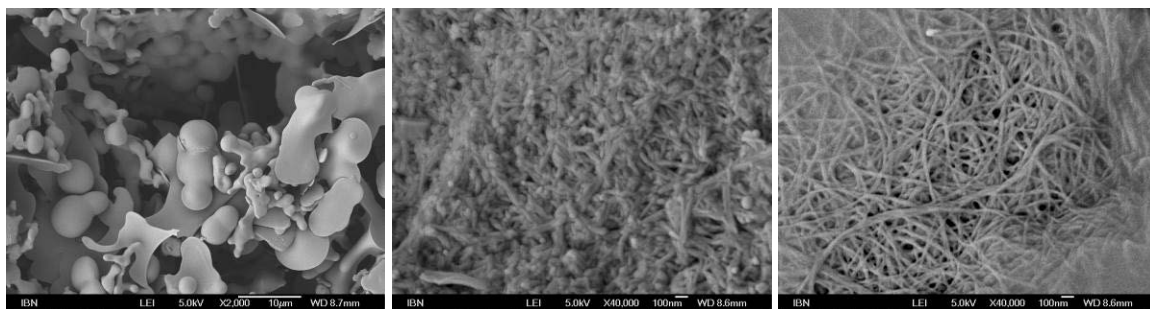

Figure S7-2. Electron micrographs of Ac-YFD: (Left) 10 mg/mL, supernatant; (middle) 10 mg/mL, hydrogel clumps; (right) 15 mg/mL

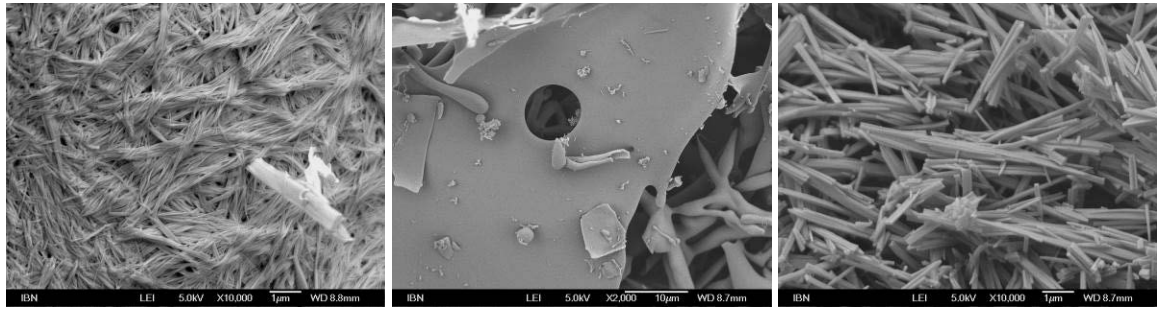

Figure S7-3. Electron micrographs of Ac-YYE: (Left) 5 mg/mL; (middle) 20 mg/mL, supernatant; (right) 20 mg/mL, precipitate

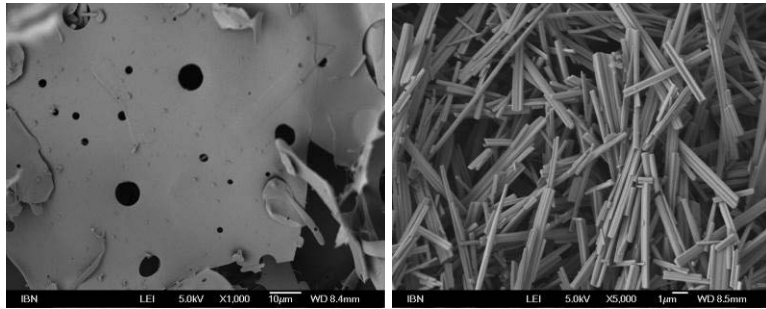

Figure S7-4. Electron micrographs of Ac-YYD-NH<sub>2</sub>: (Left) 5 mg/mL, supernatant; (right) 5 mg/mL, precipitate

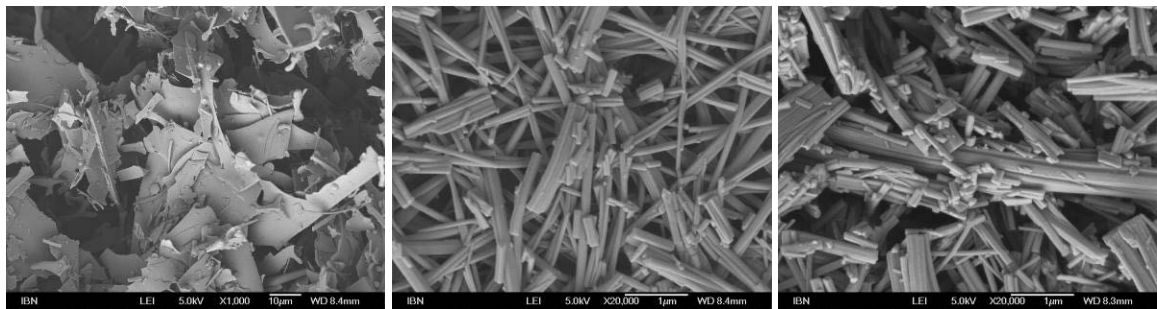

Figure S7-5. Electron micrographs of Ac-YYN: (Left) 5 mg/mL; (middle) 20 mg/mL; (right) 40 mg/mL

Table S1. Details of crystallization, data collection and refinement

**Crystal data**

|                             |                                                               |
|-----------------------------|---------------------------------------------------------------|
| Chemical formula            | C <sub>19</sub> H <sub>33</sub> N <sub>3</sub> O <sub>7</sub> |
| $M_r$                       | 415.48                                                        |
| Crystal system, space group | Monoclinic, C2                                                |
| Temperature (K)             | 100                                                           |
| $a, b, c$ (Å)               | 31.362 (3), 5.4514 (5), 13.3403 (13)                          |
| $\alpha, \beta, \gamma$ (°) | 90, 102.504 (5), 90                                           |
| $V$ (Å <sup>3</sup> )       | 2226.7 (4)                                                    |
| $Z$                         | 4                                                             |
| Radiation type              | Cu K $\alpha$ radiation, $\lambda = 1.54178$ Å                |
| $\mu$ (mm <sup>-1</sup> )   | 0.79                                                          |

**Data collection**

|                                                                            |                                         |
|----------------------------------------------------------------------------|-----------------------------------------|
| Diffractometer                                                             | Bruker Kappa APEX-II CCD diffractometer |
| $\theta_{\min}, \theta_{\max}$ (°)                                         | 2.9, 54.2                               |
| No. of measured, independent and observed [ $I > 2\sigma(I)$ ] reflections | 10179, 2662, 1785                       |
| $R_{\text{int}}$                                                           | 0.112                                   |

**Refinement**

|                                                |                                                                             |
|------------------------------------------------|-----------------------------------------------------------------------------|
| $R[F^2 > 2(F^2)], wR(F^2), S$                  | 0.059, 0.166, 0.94                                                          |
| No. of reflections                             | 2662                                                                        |
| No. of parameters                              | 273                                                                         |
| No. of restraints                              | 1                                                                           |
| $\Delta\rho_{\max, \min}$ (e Å <sup>-3</sup> ) | 0.28, -0.34                                                                 |
| Absolute structure                             | Flack x determined using 559 quotients [(I+)-(I-)]/[(I+)+(I-)] <sup>1</sup> |
| Absolute structure parameter                   | 0.0 (4)                                                                     |

**Computer programs:** APEX2<sup>2</sup>, SAINT<sup>2</sup>, SHELXD<sup>3</sup>, SHELXL2013<sup>4</sup>, ShelXle<sup>5</sup>, Coot<sup>6</sup> and publCIF<sup>7</sup>

**References**

1. Parsons, S.; Flack, H. *Acta Crystallogr., A, Found. Crystallogr.* **2004**, *60*, s61.
2. *PROTEUM2*; Bruker AXS Inc.: Madison, WI, USA, 2007.
3. Sheldrick, G. M. *Acta Crystallographica Section D: Biological Crystallography* **2010**, *66*, 479.
4. Sheldrick, G. M.; Schneider, T. R. In *Methods Enzymol.*; Charles W. Carter Jr, R. M. S., Ed.; Academic Press: 1997; Vol. 277, p 319.
5. Huebschle, C. B.; Sheldrick, G. M.; Dittrich, B. *J. Appl. Crystallogr.* **2011**, *44*, 1281.
6. Emsley, P.; Lohkamp, B.; Scott, W. G.; Cowtan, K. *Acta Crystallogr. D Biol. Crystallogr.* **2010**, *66*, 486.
7. Westrip, S. P. *J. Appl. Crystallogr.* **2010**, *43*, 920.
